# Supplementary material for: A high voltage cathode of Na2+2xFe2−x(SO4)3intensively protected by nitrogen-doped graphene with improved electrochemical performance of sodium storage
Source: Royal Society of Chemistry journal article supplement (doi:10.1039/c7ta11110j), 2018-01-01
Supplement: c7ta11110j1.pdf [file c7ta11110j1.pdf]

## Supporting Information for

# **A High Voltage Cathode of $\text{Na}_{2+2x}\text{Fe}_{2-x}(\text{SO}_4)_3$ Intensively Protected by Nitrogen-Doped Graphene with Improved Electrochemical Performance of Sodium Storage**

Wei Wang, Xiaohao Liu, Qunjie Xu, Haimei Liu

Yong-Gang Wang, Yongyao Xia, Yuliang Cao, Xinping Ai

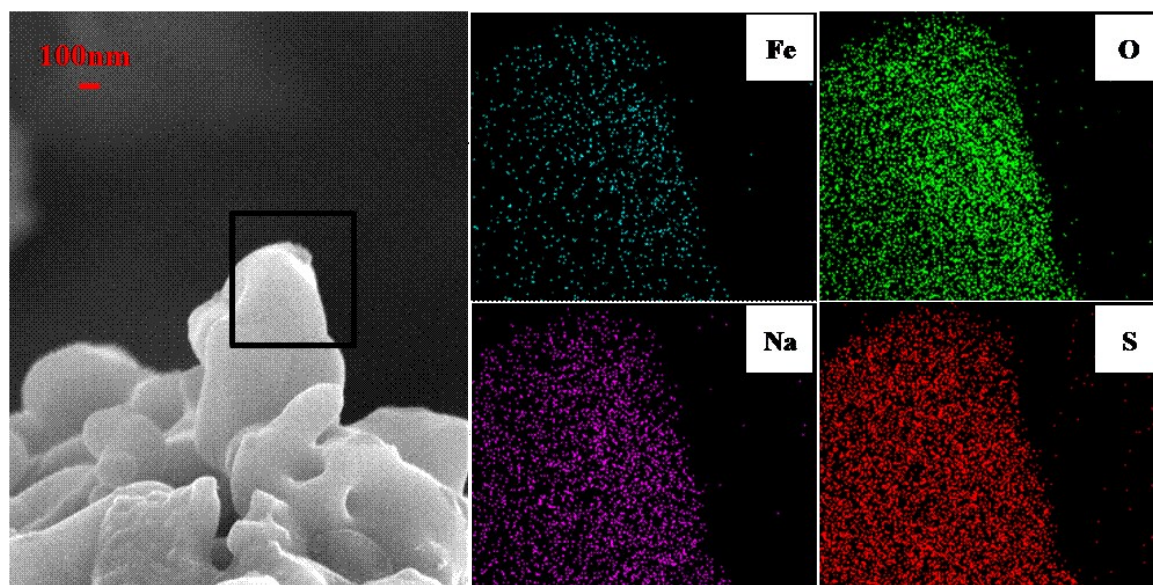

Fig. S1. SEM image of NFS sample and corresponding EDX mapping

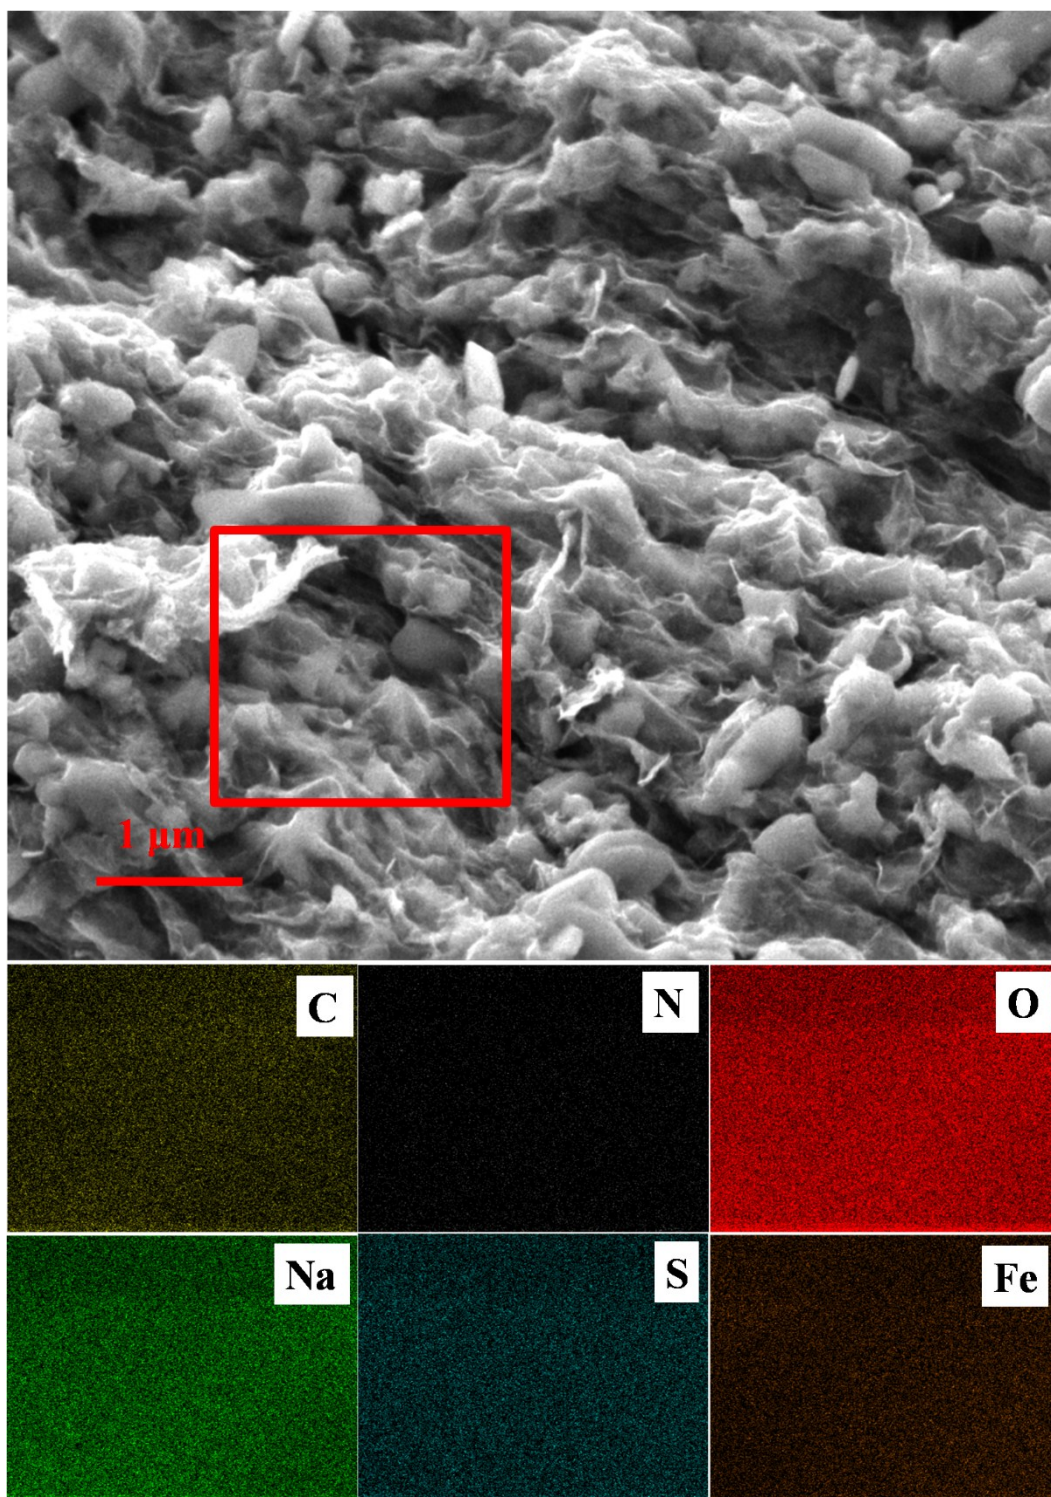

Fig. S2. SEM image of NFS@N-rGO sample and corresponding EDX mapping

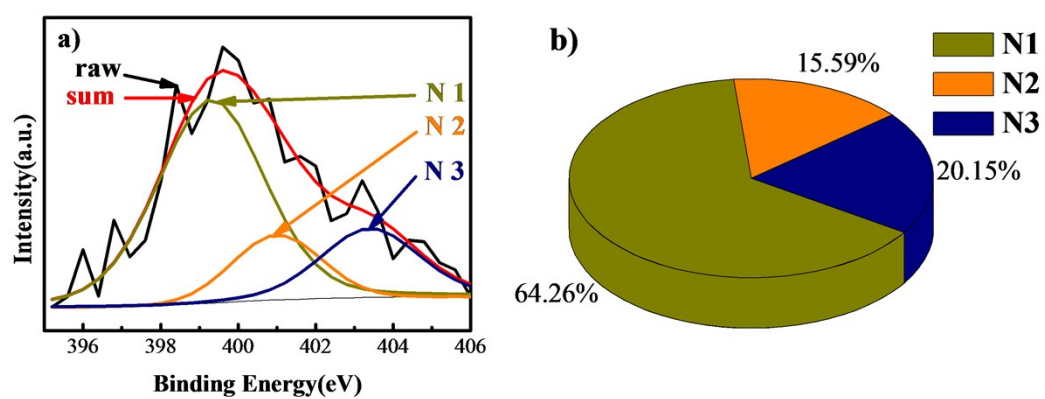

Fig. S3. a) XPS spectra of N1s for the N-rGO sample, and b) accurate contents of nitrogen species

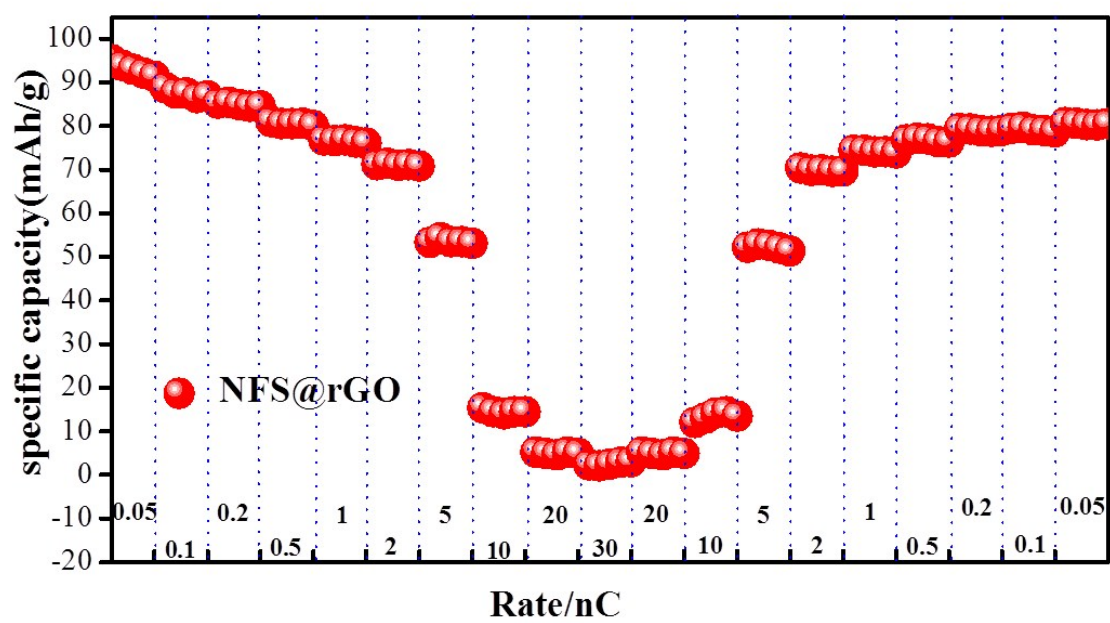

Fig. S4. The discharge capacities of NFS@rGO obtained at various C-rates.



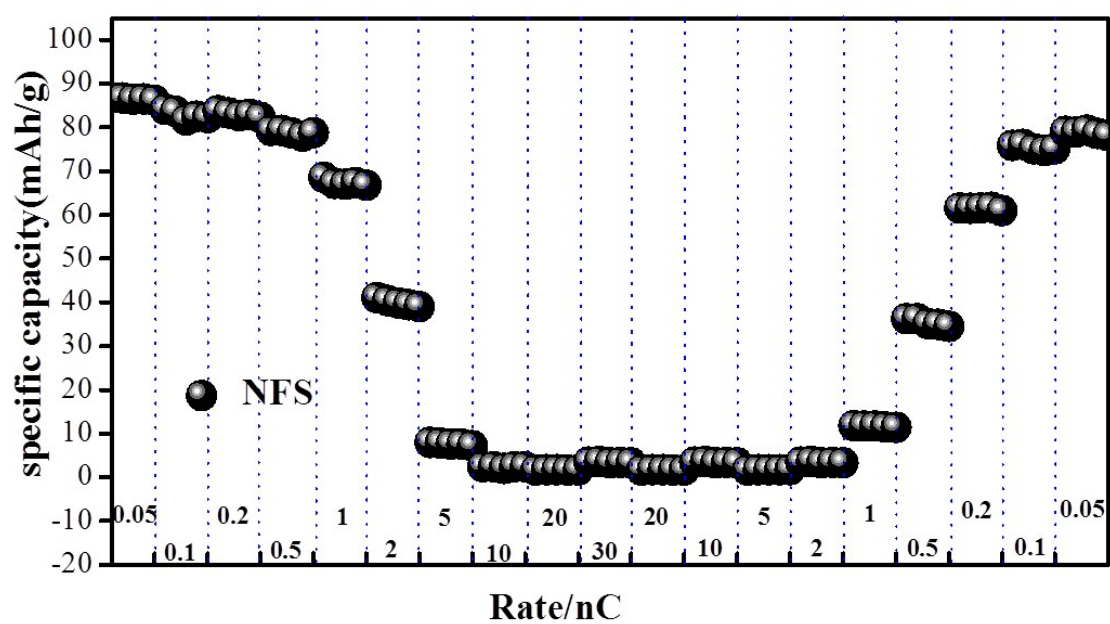

Fig. S5. The discharge capacities of NFS@rGO obtained at various C-rates.

**Table S1.** The result of Inductively coupled plasma atomic emission spectroscopy (ICP) test

| Element category | Mass content (%) | Molar ratio |
|------------------|------------------|-------------|
| Na               | 12.78            | 1           |
| Fe               | 17.08            | 1.82        |

**Table S2.** Comparison of electrochemical performace of different NFS materials

| Electrode definition | Method                             | Specific capacity                  | Cycle performance                                                          | Reference |
|----------------------|------------------------------------|------------------------------------|----------------------------------------------------------------------------|-----------|
| NFS@N-rGO            | One step co-precipitation          | 93.2 mAh g <sup>-1</sup> at 0.05 C | 95.7% retention after 100 cycles at 5C, and 86% retention after 300 cycles | This work |
| NFS@SWNT             | Top-Down                           | 90 mAh g <sup>-1</sup> at 0.05 C   | 82% retention after 400 cycles at 10C                                      |           |
| NFS                  | Solid-state                        | 100 mAh g <sup>-1</sup> at 0.05C   | 92% retention after 100 cycles at 5C                                       | 34        |
| NFS                  | Ionothermally                      | 80 mAh g <sup>-1</sup> at 0.05C    | /                                                                          | 12        |
| NFS                  | Ionothermally                      | 80 mAh g <sup>-1</sup> at 0.05C    | 85% retention after 100 cycles at 0.05C                                    | 18        |
| NFS@porous carbon    | Electrospinning and Electrospaying | 93 mAh g <sup>-1</sup> at 0.03 C   | 95.2% retention after 500 cycles at 5C                                     | 19        |
